# Supplementary material
Source: MDPI journal article supplement (https://www.mdpi.com/2673-8929/2/4/27)
Supplement: s1 [file s1]

-Supplemental Information

# Experimental Validation of the Microplastic Index – Two Approaches to Understanding Microplastics Formation

Kalouda Grigoriadi <sup>1</sup>, Merel G. A. Nooijens <sup>1</sup>, Ali E. Tasli <sup>1</sup>, Max M. C. Vanhouttem <sup>2</sup>, Sieger Henke <sup>3</sup>, Luke A. Parker <sup>3</sup>, Jan Harm Urbanus <sup>3</sup> and Arjen Boersma <sup>1,\*</sup>

Supplemental Information S1: Experimental data for the particle distributions after the milling of the polymers

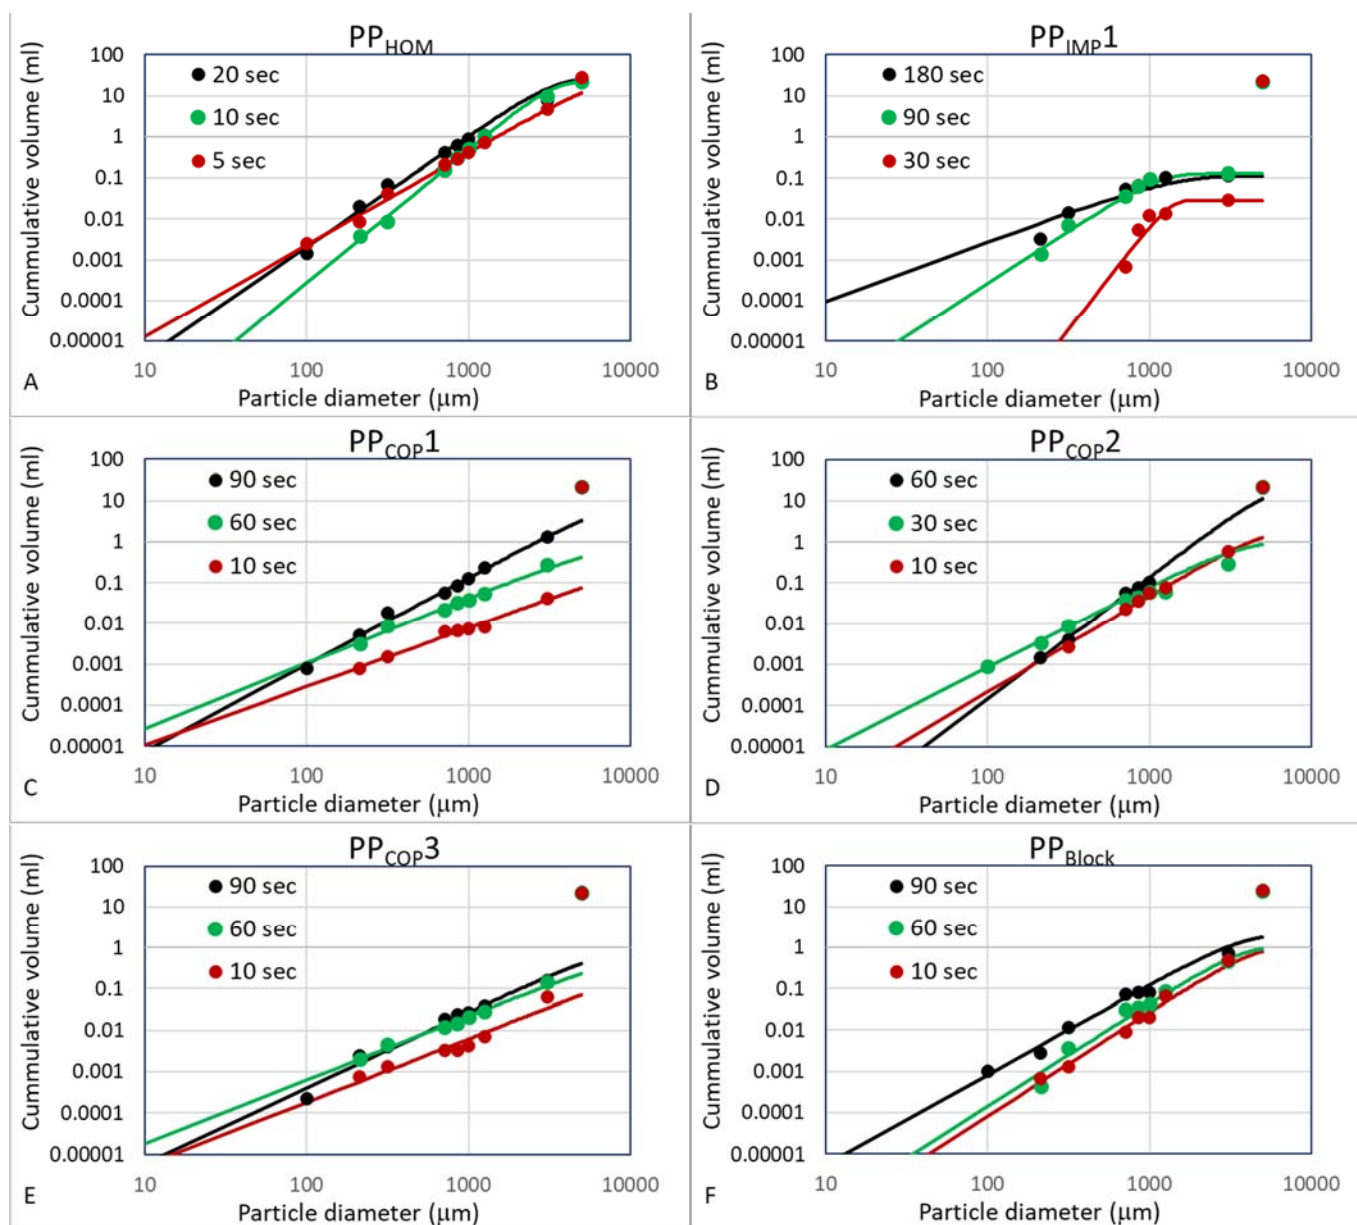

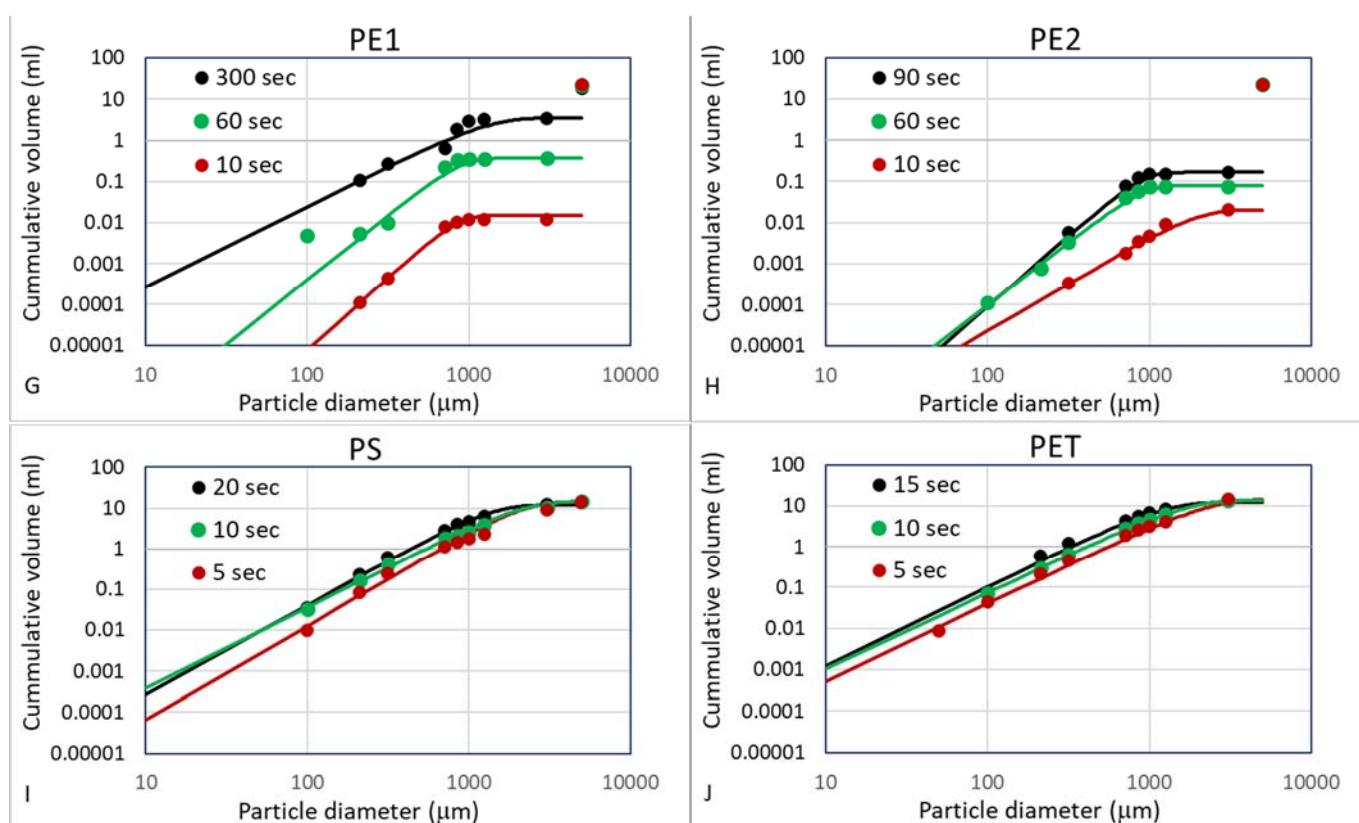

Table S1. Mill volume ( $V_{MILL}$ ), Applied milling energy (J), Weibull parameters ( $\beta$ ,  $\lambda$ ), cumulative area created by grinding ( $F_A$ ), modal particle diameter ( $D_M$ ) and final volume of generated particles by impact ( $VI_{FA}$ )

|                     | Milling time (s) | $V_{MILL}$ (ml) | $E_v$ (J) | $\beta$ (–) | $\lambda$ ( $\mu m$ ) | $F_A$ ( $cm^2$ ) | $D_M$ ( $\mu m$ ) | $VI_{FA}$ ( $mm^3/J$ ) |
|---------------------|------------------|-----------------|-----------|-------------|-----------------------|------------------|-------------------|------------------------|
| PP <sub>HOM</sub>   | 5                | 28.0            | 282       | 2.25        | 6559                  | 328.46           | 54.9              | 6.39                   |
|                     | 10               | 21.7            | 456       | 3.26        | 3205                  | 587.60           | 54.9              | 7.07                   |
|                     | 20               | 25.6            | 812       | 2.71        | 3249                  | 750.61           | 54.9              | 5.07                   |
| PP <sub>IMP1</sub>  | 30               | 0.029           | 1994      | 5.13        | 1317                  | 1.63             | 111               | 0.009                  |
|                     | 90               | 0.127           | 6498      | 2.56        | 1108                  | 11.29            | 111               | 0.019                  |
|                     | 180              | 0.114           | 16507     | 1.46        | 1285                  | 16.94            | 111               | 0.011                  |
| PP <sub>COP1</sub>  | 10               | 0.079           | 645       | 1.43        | 29277                 | 3.14             | 61.7              | 0.030                  |
|                     | 60               | 0.549           | 2658      | 1.60        | 7278                  | 17.66            | 61.7              | 0.041                  |
|                     | 300              | 4.06            | 4567      | 2.12        | 7647                  | 92.13            | 61.7              | 0.124                  |
| PP <sub>COP2</sub>  | 10               | 2.10            | 839       | 2.35        | 4893                  | 43.98            | 49                | 0.256                  |
|                     | 30               | 2.07            | 1524      | 1.99        | 3473                  | 49.78            | 48.9              | 0.160                  |
|                     | 60               | 16.8            | 3878      | 2.98        | 5303                  | 303.34           | 48.9              | 0.382                  |
| PP <sub>COP3</sub>  | 10               | 0.074           | 1080      | 1.54        | 27121                 | 2.56             | 198               | 0.047                  |
|                     | 60               | 0.266           | 4466      | 1.54        | 11798                 | 9.09             | 198               | 0.040                  |
|                     | 90               | 0.526           | 6700      | 1.83        | 2000                  | 13.87            | 198               | 0.041                  |
| PP <sub>BLOCK</sub> | 10               | 1.00            | 728       | 2.52        | 4182                  | 23.79            | 176               | 0.575                  |
|                     | 60               | 2.44            | 2558      | 2.50        | 3495                  | 48.94            | 176               | 0.337                  |
|                     | 90               | 4.25            | 3198      | 2.19        | 3542                  | 93.98            | 176               | 0.517                  |
| PE1                 | 10               | 0.015           | 752.00    | 3.54        | 848                   | 1.48             | 62                | 0.012                  |
|                     | 60               | 0.365           | 1630.00   | 3.15        | 873                   | 36.78            | 61.7              | 0.139                  |
|                     | 300              | 3.47            | 10255.69  | 1.96        | 1265                  | 336.30           | 61.7              | 0.202                  |
| PE2                 | 10               | 0.020           | 662       | 2.30        | 1904                  | 1.13             | 157               | 0.027                  |
|                     | 60               | 0.079           | 3116      | 3.06        | 890                   | 7.90             | 156.7             | 0.040                  |
|                     | 90               | 0.166           | 4586      | 3.42        | 892                   | 15.77            | 156.7             | 0.054                  |
| PS                  | 5                | 14.3            | 127       | 2.30        | 2128                  | 714.78           | 3.0               | 1.67                   |

|     |    |      |     |      |      |         |      |       |
|-----|----|------|-----|------|------|---------|------|-------|
|     | 10 | 14.5 | 185 | 1.98 | 2083 | 847.52  | 3.0  | 1.37  |
|     | 20 | 11.8 | 390 | 2.18 | 1340 | 974.86  | 3.0  | 0.747 |
| PET | 5  | 14.2 | 127 | 1.88 | 2256 | 807.19  | 49   | 31.2  |
|     | 10 | 13.8 | 150 | 1.85 | 1675 | 1071.63 | 48.9 | 34.9  |
|     | 15 | 12.1 | 158 | 1.93 | 1180 | 1278.91 | 48.9 | 39.5  |

### Supplemental Information S2: Crystallinity of the polymers used

The crystallinity of the polymers was obtained using a TA Instruments DSC25. The heating and cooling rates were 10 K/min and the atmosphere was nitrogen.

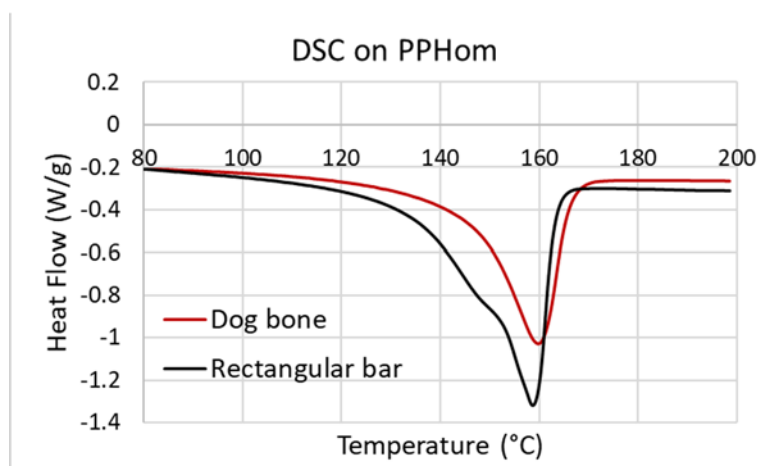

Figure S2. DSC traces of the first heating curves of the two samples assessed for PP<sub>Hom</sub>: Small dog bone sample and larger rectangular bar.

The crystallinities of the polymers is calculated using the enthalpy of melting as given by Grigorescu [20]. The results of the DSC measurements and calculations are listed in table S2.

Table S2. Heats of melting of the polymers assessed and calculated crystallinity.

| Polymer             | Dogbone                     |                                |                   | Rectangular bar                |                   |
|---------------------|-----------------------------|--------------------------------|-------------------|--------------------------------|-------------------|
|                     | Melting enthalpy [20] (J/g) | Heat of melting from DSC (J/g) | Crystallinity (%) | Heat of melting from DSC (J/g) | Crystallinity (%) |
| PP <sub>Hom</sub>   | 207                         | 95.1                           | 46                | 118.7                          | 57                |
| PP <sub>Imp1</sub>  | 207                         | 67.5                           | 33                | 72.6                           | 35                |
| PP <sub>Cop1</sub>  | 207                         | 78.9                           | 38                | 80.7                           | 39                |
| PP <sub>Cop2</sub>  | 207                         | 97.5                           | 47                | 102.7                          | 50                |
| PP <sub>Cop3</sub>  | 207                         | 81.0                           | 39                | 93.3                           | 45                |
| PP <sub>Block</sub> | 207                         | 78.5                           | 38                | 81.9                           | 40                |
| PE1                 | 293                         | 196.7                          | 67                | 301.2                          | 69                |
| PE2                 | 293                         | 197.0                          | 67                | 199.4                          | 68                |
